# Supplementary material for: POSS-based meso-/macroporous covalent networks: supporting and stabilizing Pd for Suzuki–Miyaura reaction at room temperature
Source: Royal Society of Chemistry journal article supplement (doi:10.1039/c6ra10641b), 2016-01-01
Supplement: c6ra10641b1.pdf [file c6ra10641b1.pdf]

## Supplementary Information

### POSS-based Meso-/macro-porous Covalent Networks: Supporting and Stabilizing Pd for Suzuki-Miyaura Reaction at Room Temperature

Chenjun Zhang,<sup>a</sup> Yan Leng,<sup>\*a</sup> Pingping Jiang,<sup>a</sup> and Dan Lu<sup>a</sup>

<sup>a</sup> The Key Laboratory of Food Colloids and Biotechnology, Ministry of Education, School of Chemical and Material Engineering, Jiangnan University, Wuxi 214122, China. Fax: +86-510-85917763; Tel: +86-510-85917090; E-mail: lengyan1114@126.com.

**Table S1.** CHN elemental analysis and BET surface areas of samples POSS-TPA<sub>x</sub>.

| Sample                | N (%) | C (%) | H (%) | S <sub>BET</sub> (m <sup>2</sup> /g) | Pore volume (m <sup>3</sup> /g) | Pore size (nm) | Molar ratio POSS/PDA |
|-----------------------|-------|-------|-------|--------------------------------------|---------------------------------|----------------|----------------------|
| POSS-TPA <sub>a</sub> | 8.88  | 43.08 | 8.16  | 206                                  | 1.11                            | 21.5           | 1/2.7                |
| POSS-TPA <sub>b</sub> | 8.85  | 47.25 | 8.42  | 151                                  | 0.89                            | 23.5           | 1/2.8                |
| POSS-TPA <sub>c</sub> | 8.80  | 48.83 | 8.30  | 144                                  | 1.12                            | 31.3           | 1/2.9                |
| POSS-TPA <sub>d</sub> | 8.40  | 50.75 | 8.24  | 120                                  | 0.61                            | 20.2           | 1/3.3                |

**Table S2.** Suzuki coupling of bromobenzene with phenylboronic acid over catalyst Pd/POSS-TPA<sub>a</sub>.

| Entry | Catalyst amount (g) | Yield <sup>a</sup> (%) |        | TOF <sup>b</sup> |
|-------|---------------------|------------------------|--------|------------------|
|       |                     | 10 min                 | 30 min |                  |
| 1     | 0.005               | 17                     | 49     | 1133             |
| 2     | 0.01                | 90                     | 92     | 3033             |
| 3     | 0.015               | 91                     | 93     | 2000             |
| 4     | 0.02                | 92                     | 99     | 1533             |

Reaction conditions: phenylboronic acid (1.5 mmol), bromobenzene (1 mmol), Na<sub>2</sub>CO<sub>3</sub> (0.15 g), deionized water (3 mL) and ethanol (3 mL), room temperature. <sup>a</sup> The yield of product. <sup>b</sup> TOF = [mol product]/([mol Pd][reaction time 1/6 h]).

**Table S3.** The catalytic performance of Pd/POSS-TPA<sub>a</sub> for the Suzuki coupling reaction with different phenylboronic acid/bromobenzene molar ratio.

| Entry | Phenylboronic acid/bromobenzene<br>molar ratio | Yield <sup>a</sup> (%) |        | TOF <sup>b</sup> |
|-------|------------------------------------------------|------------------------|--------|------------------|
|       |                                                | 10 min                 | 30 min |                  |
| 1     | 1.1:1                                          | 80                     | 87     | 1333             |
| 2     | 1.3:1                                          | 81                     | 92     | 1349             |
| 3     | 1.5:1                                          | 92                     | 98     | 1533             |

Reaction conditions: bromobenzene (1 mmol), Na<sub>2</sub>CO<sub>3</sub> (0.15 g), deionized water (3 mL) and ethanol (3 mL), catalyst (0.02 g, 0.0036 mmol), room temperature. <sup>a</sup> The yield of product. <sup>b</sup> TOF = [mol product]/([mol Pd][reaction time 1/6 h]).

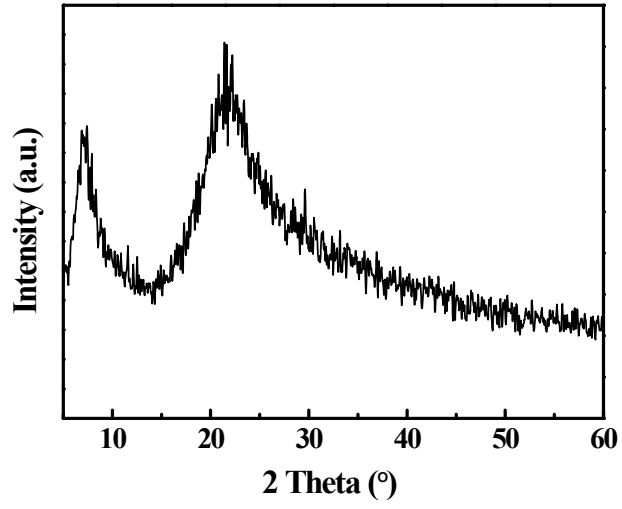

Figure S1. XRD pattern of POSS.

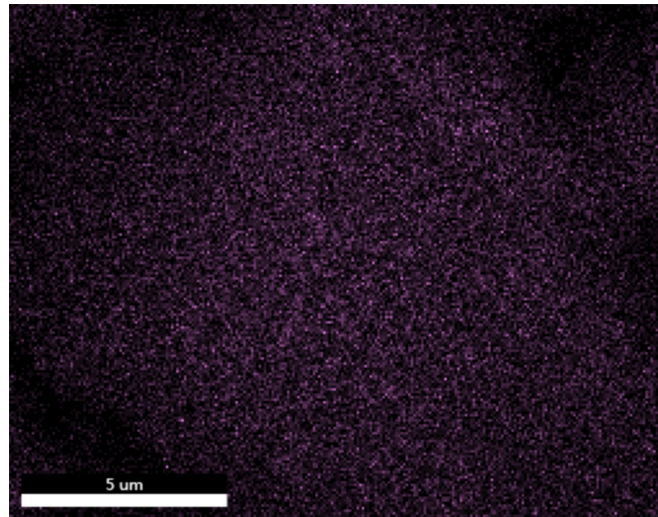

Figure S2. EDS elemental mapping of Si element for POSS-TPA<sub>a</sub>.

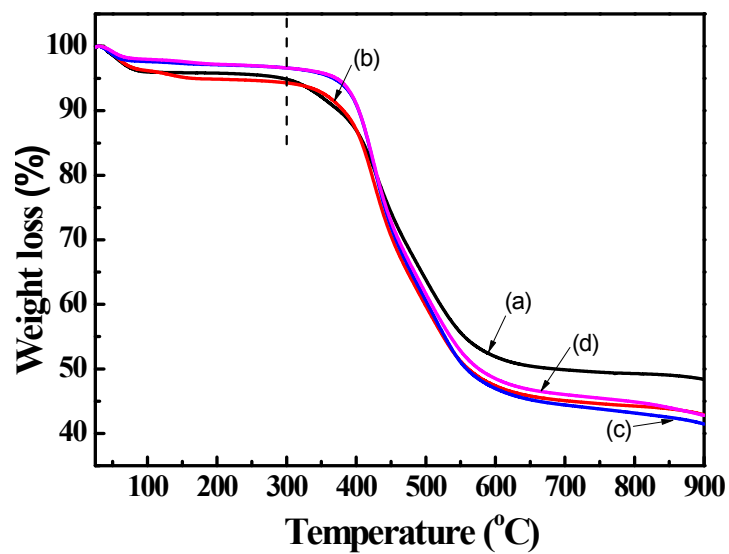

Figure S3. TG curves of (a) POSS-TPA<sub>a</sub>, (b) POSS-TPA<sub>b</sub>, (c) POSS-TPA<sub>c</sub>, and (d) POSS-TPA<sub>d</sub>.

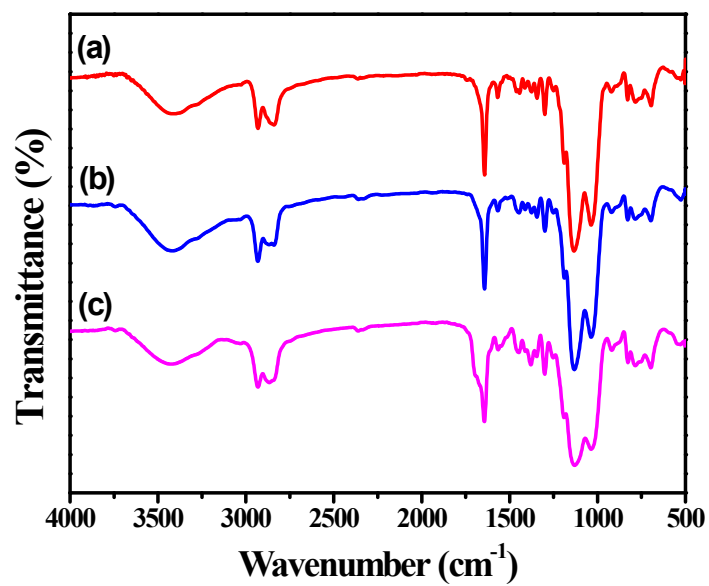

Figure S4. FT-IR spectra of (a) POSS-TPA<sub>b</sub>, (b) POSS-TPA<sub>c</sub>, and (c) POSS-TPA<sub>d</sub>.

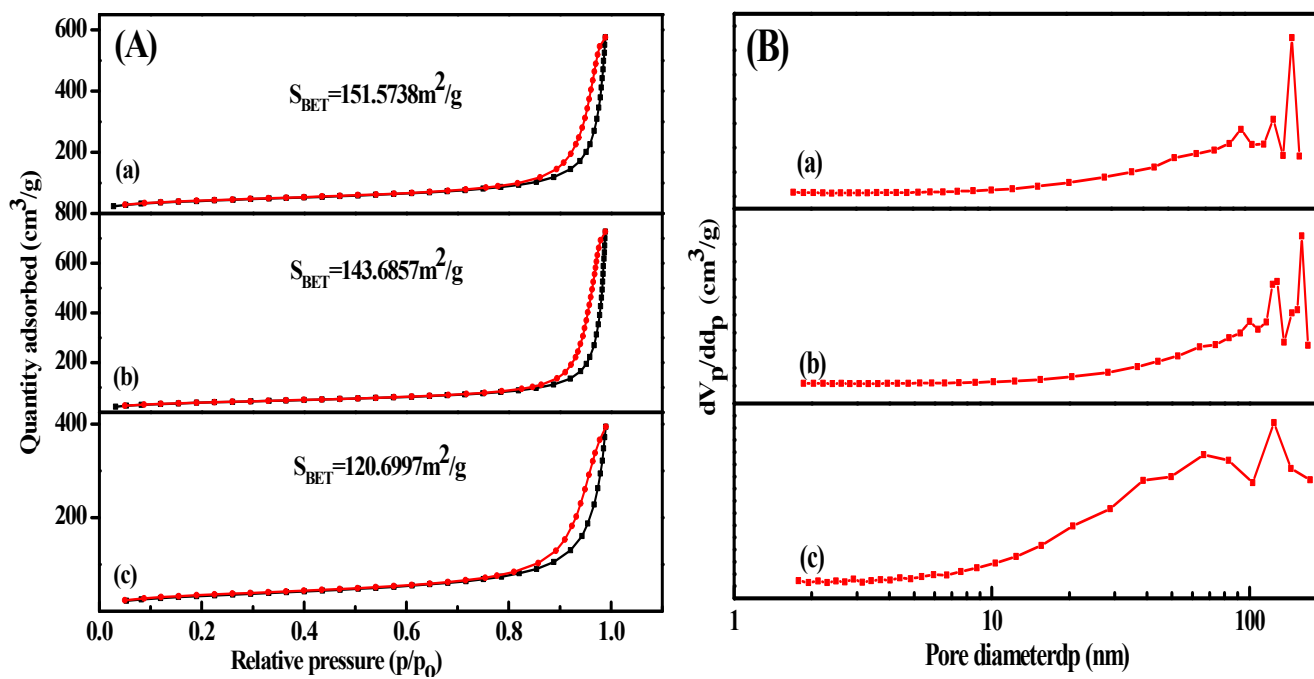

Figure S5. (A) Nitrogen adsorption–desorption isotherms and (B) BJH pore size distributions of (a) POSS-TPA<sub>b</sub>, (b) POSS-TPA<sub>c</sub>, and (c) POSS-TPA<sub>d</sub>.

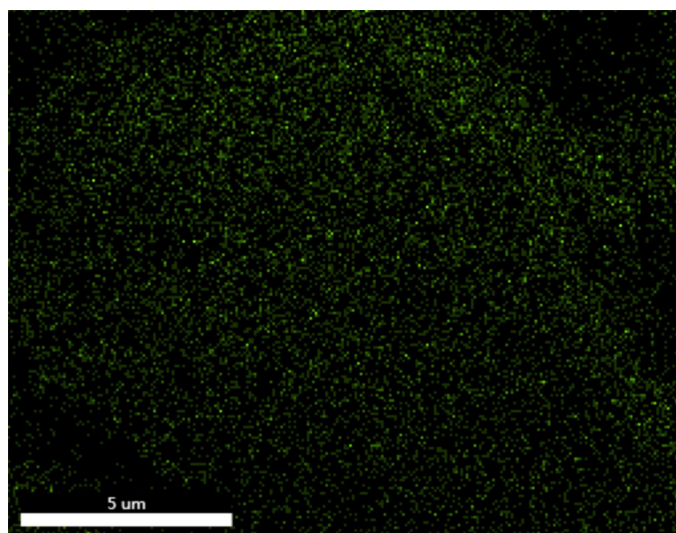

Figure S6. EDS elemental mapping of Pd element for Pd/POSS-TPA<sub>a</sub>.

**Table S4** Comparison of the catalytic efficiency of Pd/POSS-TPA<sub>a</sub> with previously reported catalysts.

| Entry | Catalyst                                                                  | Reaction conditions                                                                                                                               | Yield(%) | TOF(h <sup>-1</sup> ) | Ref. (year) |
|-------|---------------------------------------------------------------------------|---------------------------------------------------------------------------------------------------------------------------------------------------|----------|-----------------------|-------------|
| 1     | Fe <sub>3</sub> O <sub>4</sub> @C–Pd@mCeO <sub>2</sub> (Pd 3.05 wt%)      | Bromobenzene (1.0 mmol), Phenylboronicacid (1.2 mmol), K <sub>2</sub> CO <sub>3</sub> (2.0 mmol), 5.0 mL ETOH/H <sub>2</sub> O (1:1), 80°C, 3h    | 95       | 116.3                 | 1(2015)     |
| 2     | Pd@Im–Phos–SiO <sub>2</sub> @Fe <sub>3</sub> O <sub>4</sub> (Pd 0.3 mol%) | Bromobenzene (1.0 mmol), Phenylboronicacid (1.5 mmol), K <sub>2</sub> CO <sub>3</sub> (1.5 mmol), 2.0 mL ETOH/H <sub>2</sub> O (1:1), 60 °C, 18h  | 90       | 16.67                 | 2(2016)     |
| 3     | Ionic liquid-tagged palladium complex (Pd 0.1 mol%)                       | Bromobenzene (1.0 mmol), Phenylboronicacid (1.2 mmol), K <sub>2</sub> CO <sub>3</sub> (2.0 mmol), 5.0 mL H <sub>2</sub> O, r.t. 50min             | 76       | 912                   | 3(2014)     |
| 4     | Bisoxazoline/Pd composite microsphere (Pd 0.1 mol%)                       | Bromobenzene (1.0 mmol), Phenylboronicacid (1.0 mmol), K <sub>2</sub> CO <sub>3</sub> (2.0 mmol), 5.0 mL H <sub>2</sub> O/PEG400 (10:1), 70°C, 4h | 98       | 245                   | 4(2015)     |
| 5     | Pd/C (Pd 0.7 mol%)                                                        | Bromobenzene (2.0 mmol), Phenylboronicacid (2.5 mmol), KOH (8.0 mmol), NaCl (6.0 g), 6.0 mL Di-n-butyl ether, 100°C, 1h                           | 24.7     | 35.2                  | 5(2014)     |
| 6     | Pd/bentonite (Pd 0.06 mol%)                                               | Bromobenzene (0.5 mmol), Phenylboronicacid (0.6 mmol), K <sub>2</sub> CO <sub>3</sub> (1.0 mmol), 5.0 mL MeOH, r.t. 5h                            | 95       | 316                   | 6(2013)     |
| 7     | Pd/Uio-66 (Pd 0.59 mol%)                                                  | Bromobenzene (0.5 mmol), Phenylboronicacid (0.6 mmol), Na <sub>2</sub> CO <sub>3</sub> (1.0 mmol), 6.0 mL ETOH/H <sub>2</sub> O (1:2), 80°C, 2h   | 100      | 86                    | 7(2016)     |
| 8     | Pd/COF-LZU1 (Pd 0.5 mol %)                                                | Bromobenzene (1.0 mmol), Phenylboronicacid (1.5 mmol), K <sub>2</sub> CO <sub>3</sub> (2.0 mmol), 4.0 mL p-xylene, 150°C, 3h                      | 97       | 64.67                 | 8(2011)     |
| 9     | HMMS–salpr–Pd (Pd 1mol%)                                                  | Bromobenzene (0.5 mmol), Phenylboronicacid (0.6 mmol), K <sub>2</sub> CO <sub>3</sub> (1.0 mmol), 6.0 mL ETOH/H <sub>2</sub> O (1:1), 70 °C, 6h   | 92       | 16.25                 | 9(2015)     |
| 10    | Fe <sub>3</sub> O <sub>4</sub> /PPy–Pd (Pd 1 mol%)                        | Bromobenzene (0.5 mmol), Phenylboronicacid (0.75 mmol), K <sub>2</sub> CO <sub>3</sub> (1.0 mmol), 5.0 mL H <sub>2</sub> O, 70°C, 8h              | 96.5     | 12.06                 | 10(2015)    |
| 11    | PdNP-2 (Pd 0.001 mol%)                                                    | Bromobenzene (1.0 mmol), Phenylboronicacid (1.5 mmol), K <sub>3</sub> PO <sub>4</sub> (2.0 mmol), 10.0 mL ETOH/H <sub>2</sub> O (1:1), 80°C, 24h  | 89       | 3708                  | 11(2016)    |
| 12    | Wool–Pd (Pd 0.45 mol %)                                                   | Bromobenzene (0.2 mmol), Phenylboronicacid (0.22 mmol), K <sub>2</sub> CO <sub>3</sub> (0.3 mmol), 5.0 mL H <sub>2</sub> O, 75°C, 3h              | 85       | 62.9                  | 12(2012)    |
| 13    | Pd/bentonite (Pd 0.06 mol %)                                              | Bromobenzene (0.5 mmol), Phenylboronicacid (0.6 mmol), K <sub>2</sub> CO <sub>3</sub> (1.0 mmol), 5.0 mL MeOH, r.t. 5h                            | 95       | 316.6                 | 13(2013)    |
| 14    | Pd@imine–SiO <sub>2</sub> (Pd 0.463 mol%)                                 | Bromobenzene (0.5 mmol), Phenylboronicacid (0.6 mmol), Na <sub>2</sub> CO <sub>3</sub> (1.5 mmol), 4 ml iPrOH/H <sub>2</sub> O (1:1), r.t. 1h     | 100      | 215.9                 | 14(2015)    |
| 15    | Pd/POSS-TPA <sub>a</sub> (Pd 0.36 mol %)                                  | Bromobenzene (1 mmol), Phenylboronicacid (1.5 mmol), Na <sub>2</sub> CO <sub>3</sub> (1.0 mmol), 6.0 mL ETOH/H <sub>2</sub> O (1:1), r.t, 10 min  | 92       | 1533                  | Our work    |

**Reference**

- 1 Y. Li, Z. Zhang, J. Shen and M. Ye. *Dalton Trans.*, 2015, **44**, 16592-16601.
- 2 M. Gholinejad, M. Razeghi, A. Ghaderi and P. Biji. *Catal. Sci. Technol.*, 2016, **6**, 3117-3127.

- 3 P. Nehra, B. Khungar, K. Pericherla, S.C.Sivasubramanian and A. Kumar. *Green Chem.*, 2014, **16**, 4266-4271.
- 4 J. Wang, Y. Zhong, X. Wang, Y. Hu, G. Yue and Y. Pan. *Green Chem.*, 2016, **18**, 967-973.
- 5 B. Zhang, J. Song, H. Liu, J. Ma, H. Fan, W. W, P. Zhang and B. Han. *Green Chem.*, 2014, **16**, 1198-1201.
- 6 G. Ding, W. Wang, T. Jing and B. Han. *Green Chem.*, 2013, **15**, 3396-3403.
- 7 M. Pourkhosrvani, S. Dehghanpour and F.farzaneh. 2016, **146**, 499-508.
- 8 S. Ding, J. Gao, Q. Wang, Y. Zhang, W. Song. C. Su and W. Wei. *J. Am. Chem. Soc.*, 2011, **133**, 19816-19822.
- 9 H. Liu, P. Wang, H. Yang, J. Niu and J. Ma. *New J. Chem.*, 2015, **39**, 4343-4350.
- 10 X. Sun, Y. Zheng, L. Sun, H. Su and C.Qi. *Catal Lett.*, 2015, **145**, 1047-1053.
- 11 C. Wang, R. Ciganda, L. Salmon, D. Gregurec, J. Irigoyen, S. Moya, J. Ruzi and D. Astruc. *Angew. Chem. Int. Ed.*, 2016, **55**, 3091-3095.
- 12 H. Ma, W. Cao, Z. Bao and ZQ. Lei. *Catal. Sci. Technol.*, 2012, **2**, 2291-2296.
- 13 G. Ding, W. Wang, T. Jiang, B. Han. *Green Chem.*, 2013, **15**, 3396-3403.
- 14 T. Begum, M. Mondal, PK. Gogoi, U. Bora. *RSC Advance.*, 2015, **5**, 38085-38092.
